# Supplementary material for: Zinc(ii) centered biologically active novel N,N,O donor tridentate water-soluble hydrazide-based O-carboxymethyl chitosan Schiff base metal complexes: synthesis and characterisation
Source: Royal Society of Chemistry journal article supplement (doi:10.1039/c9nj00670b), 2019-01-01
Supplement: c9nj00670b1.pdf [file c9nj00670b1.pdf]

### Supportive information

1. The porosity of chitosan, Schiff base and their complexes was measured using the formula

$$\text{Porosity } (\phi) = \frac{V_b - V_{ma}}{V_b} \times 100$$

where,  $V_b$  is the total volume of the compound,  $V_{ma}$  is the volume of matrix [1].

| S.No. | Name of the complex            | Porosity ( $\phi$ ) of the prepared Zn (II) complex in percentage |
|-------|--------------------------------|-------------------------------------------------------------------|
| 1     | 2a-OCMCN-Zn (OAc) <sub>2</sub> | 4.61                                                              |
| 2     | 2b-OCMCN-Zn (OAc) <sub>2</sub> | 3.63                                                              |

2. The EDAX spectrum reveals the weight percentage of zinc in the carboxymethyl chitosan Schiff base Zn (II) complexes is given below

| S.No. | Name of the complex            | Weight percentage of zinc in prepared complex |
|-------|--------------------------------|-----------------------------------------------|
| 1     | 2a-OCMCN-Zn (OAc) <sub>2</sub> | 8.43                                          |
| 2     | 2b-OCMCN-Zn (OAc) <sub>2</sub> | 7.86                                          |

Weight % (2a-OCMCN-Zn (OAc)<sub>2</sub>)

|                    | C     | N     | O     | Si | Cl   | Zn   |
|--------------------|-------|-------|-------|----|------|------|
| <b>Base(2)_pt2</b> | 27.29 | 11.66 | 51.87 |    | 0.75 | 8.43 |

Weight % (2b-OCMCN-Zn (OAc)<sub>2</sub>)

|                    | C     | N     | O     | Al   | Si   | S    | Cl   | Ca   | Zn   |
|--------------------|-------|-------|-------|------|------|------|------|------|------|
| <b>Base(1)_pt1</b> | 27.16 | 12.51 | 50.62 | 0.67 | 0.22 | 0.20 | 0.68 | 0.08 | 7.86 |

3. The IC<sub>50</sub> value of the compounds was measured and it has been represented in supportive information studies [2].

| S.No. | Name of the compounds          | IC <sub>50</sub> value (μM) |
|-------|--------------------------------|-----------------------------|
| 1     | 2a-OCMCN                       | 140.43                      |
| 2     | 2b-OCMCN                       | 324.88                      |
| 3     | 2a-OCMCN-Zn (OAc) <sub>2</sub> | 37.91                       |
| 4     | 2b-OCMCN-Zn (OAc) <sub>2</sub> | 259.3                       |
| 5     | Vitamin C                      | 32.41                       |

## References

1. Egli, D., Baumann, R., K ung, S., Berger, A., Baron, L., & Herwegh, M. (2018). Structural characteristics, bulk porosity and evolution of an exhumed long-lived hydrothermal system. *Tectonophysics*. doi:10.1016/j.tecto.2018.10.008
2. Kharazmi-Khorassani, J., Asoodeh, A., & Tanzadehpanah, H. (2019). Antioxidant and angiotensin-converting enzyme (ACE) inhibitory activity of thymosin alpha-1 (Thα1) peptide. *Bioorganic Chemistry*. doi:10.1016/j.bioorg.2019.04.003.
